# Supplementary material
Source: publisher figshare collection journal article supplement (https://acs.figshare.com/ndownloader/files/5972637)
Supplement: Supplementary file 1 [file 5972637]

## Sheet: PLS
					PLS Factors	SD	R2	Q2 Int	Q2 Ext
					1	0.836	0.3063	0.2503	0.3526
					2	0.6388	0.5954	0.5779	0.6432
					3	0.5502	0.7002	0.6872	0.7463
					4	0.4853	0.767	0.7384	0.7713
					5	0.4536	0.7967	0.7675	0.7901
					Predictive power of the PLS models.
					R^2: Training set correlation
					Q^2 Int: Test set internal correlation
					Q^2 Ext: Test set external (new compounds) correlation
					SD: standard deviation
					PLS Factor: Maximun number of PLS factor

## Sheet: KPLS Models
					Kernel nl factor	R^2	Q^2 Int	KPLS factor	SD	R^2	Q^2 Int	KPLS factor	SD	R^2	Q^2 Int	KPLS factor	SD	R^2	Q^2 Int	KPLS factor	SD	R^2	Q^2 Int	KPLS factor	SD
						Dendritic				Linear				MOLPRINT2D				Radial				Ordinary descriptors
					0.01	0.7398	0.643	5	0.5132	0.7238	0.6543	5	0.5244	0.6111	0.6012	5	0.6274	0.667	0.5911	5	0.5806	0.7845	0.7922	5	0.467
					0.02	0.7644	0.6578	5	0.4884	0.7519	0.665	5	0.5011	0.6166	0.6022	5	0.623	0.6766	0.5914	5	0.5722	0.7899	0.7969	5	0.4612
					0.03	0.7827	0.6624	5	0.4689	0.7816	0.664	5	0.4702	0.6257	0.6048	5	0.6257	0.6912	0.5929	5	0.5591	0.7993	0.8048	5	0.4508
					0.04	0.8061	0.6715	5	0.4431	0.8028	0.6706	5	0.4467	0.6385	0.6098	5	0.6049	0.71	0.5961	5	0.5418	0.8122	0.8153	5	0.436
					0.05	0.8383	0.6622	5	0.4046	0.8392	0.6593	5	0.4034	0.6548	0.6172	5	0.5911	0.7311	0.6013	5	0.5217	0.8288	0.827	5	0.4163
					0.06	0.8543	0.6284	4	0.3838	0.8862	0.6386	5	0.3394	0.6782	0.6289	5	0.5707	0.7526	0.6099	5	0.5005	0.8443	0.8357	5	0.397
					0.07	0.8846	0.5862	4	0.3416	0.8771	0.6049	4	0.3525	0.7019	0.6379	5	0.5493	0.7774	0.6167	5	0.4747	0.8588	0.8444	5	0.378
					0.08	0.8725	0.5235	3	0.3588	0.8551	0.539	3	0.3825	0.7046	0.6306	5	0.5468	0.8144	0.6144	5	0.4335	0.8667	0.8488	5	0.3674
					0.09																	0.8728	0.845	5	0.3588
					0.1																	0.879	0.8395	5	0.3499
						Dendritic + Ordinary descriptors				Linear + Ordinary descriptors				MOLPRINT2D + Ordinary descriptors				Radial + Ordinary descriptors
					0.01	0.8644	0.8463	5	0.3705	0.8596	0.8453	5	0.377	0.8535	0.8496	5	0.3851	0.8504	0.8525	5	0.3892
					0.02	0.8523	0.8375	4	0.3864	0.8494	0.8391	4	0.3903	0.8438	0.8451	4	0.3974	0.8576	0.8558	5	0.3797
					0.03	0.8698	0.8443	4	0.3629	0.8672	0.848	4	0.3664	0.8535	0.8518	4	0.3848	0.8479	0.8594	4	0.3921
					0.04	0.8767	0.8302	4	0.3532	0.88	0.8403	4	0.3484	0.8645	0.8565	4	0.3702	0.8615	0.8641	4	0.3743
					0.05	0.8426	0.7571	3	0.3987	0.8675	0.7848	3	0.3659	0.8417	0.8358	3	0.3999	0.8743	0.8634	4	0.3565
					0.06	0.8507	0.7066	3	0.3884	0.8957	0.758	3	0.3245	0.8474	0.8355	3	0.3926	0.8549	0.8386	3	0.3828
					0.07									0.8507	0.8291	3	0.3883	0.8725	0.8375	3	0.3589
					0.08									0.8538	0.8182	3	0.3843	0.8891	0.8283	3	0.3346
						Performance of the KPLS models.
						Kernel nl Factor: kernel nonlinearity value
						R^2: Training set correlation
						Q^2 Int: Test set internal correlation
						SD: standard deviation
						KPLS factor: maximum number of KPLS factors
						Colors highlight the best R2 and Q2 values for each fingerpring set e/o fingerprint+Ordinary descriptors set.

## Sheet: KPLS Predictions
			Model	R^2	Q^2 Int	Q^2 Ext	Q^2 Met
			Only traditional descriptors	0.8667	0.8488	0.8166	NS
			Dendritic + Ordinary descriptors	0.8644	0.8463	0.8271	0.6524
			Linear + Ordinary descriptors	0.8672	0.848	0.8136	0.8803
			MOLPRINT2D + Ordinary descriptors	0.8645	0.8565	0.8377	0.389
			Radial + Ordinary descriptors	0.8615	0.8641	0.8303	0.7555
			Predictive power of the best KPLS models.
			R^2: Training set correlation
			Q^2 Int: Test set internal correlation
			Q^2 Ext: Test set external (new compounds) correlation
			Q^2 Met: Metabolites of URB937 correlation

## Sheet: MLR
			Model	N° of X variables	R^2	Q^2 int	Q^2 ext
			1	1	0.4692	0.5029	0.5112
			2	2	0.628	0.6406	0.6698
			3	3	0.7072	0.6946	0.7538
			4	4	0.7373	0.7085	0.7714
			5	5	0.7491	0.7176	0.7689
			6	6	0.7599	0.7227	0.7757
			7	7	0.7737	0.7446	0.8
			8	8	0.7903	0.7278	0.7088
			9	9	0.7983	0.7397	0.6902
			10	10	0.8081	0.7458	0.7121
